# Supplementary material
Source: HighWire-hosted journal article supplement (https://www.ajnr.org/highwire/filestream/60060/field_highwire_adjunct_files/0/17-01086.pdf)
Supplement: 17-01086.pdf [file 17-01086.pdf]

**On-line Table: Descriptions of the premorbid conditions of the patients in studies**

| Authors, Year                          | No. | Age (yr) | Imaging                                   | Selection Criteria                                                                                                                                                   | NIHSS | ASPECTS | Device                 | Study | Patients Included with Baseline mRS ≤ 2 |
|----------------------------------------|-----|----------|-------------------------------------------|----------------------------------------------------------------------------------------------------------------------------------------------------------------------|-------|---------|------------------------|-------|-----------------------------------------|
| Broussalis et al, 2016 <sup>9</sup>    | 28  | 82.5     | CT and CTA or MR, MRA, MRP                | LAO (ICA, M1, or BA), no ICH, NIHSS ≥4, premorbid mRS ≤2, present ≤6 hr                                                                                              | 18    | NA      | SR                     | P     | 28                                      |
| Kurre et al, 2013 <sup>10</sup>        | 109 | 83       | CT or MRI, CTA, or MRA                    | Ant circ LAO, no ICH, NIHSS ≥4, NIHSS <4 considered, present ≤8 hr, present >8 hr considered                                                                         | 15    | NA      | SR and A               | R     | 95                                      |
| Ribo et al, 2014 <sup>11</sup>         | 72  | 83       | CT and CTA                                | Ant circ LAO (ICA or M1 or M2), NIHSS ≥7, ASPECTS ≥7, present ≤8 hr, present >4.5 hr considered                                                                      | 19    | 10      | IA thrombolysis and SR | R     | 72                                      |
| Azkune Calle et al, 2017 <sup>12</sup> | 31  | 85.2     | NA                                        | Ant circ LAO, not improved within first 30 min of IVT, present ≤6 hr                                                                                                 | 16.6  | 8.6     | SR                     | R     | 31                                      |
| To et al, 2015 <sup>13</sup>           | 18  | NA       | Significant penumbra on CTP or MRP        | NIHSS ≥8 or severe focused deficit, present ≤8 hr                                                                                                                    | 18.2  | NA      | NA                     | R     | NA                                      |
| Cohen et al, 2016 <sup>14</sup>        | 16  | 83.4     | CT and CTA, MRA, or DSA                   | Ant circ LAO (ICA, prox MCA), no ICH, NIHSS ≥10, premorbid mRS ≤2, present ≤8 hr, Infarct ≤1/3 MCA territory, INR < 3, no preexisting terminal illness, no deep coma | 18.4  | NA      | SR                     | R     | 16                                      |
| Khan et al, 2016 <sup>15</sup>         | 18  | 91.9     | CT, CTA                                   | NA                                                                                                                                                                   | 18.2  | NA      | NA                     | R     | 17                                      |
| Kleine et al, 2016 <sup>16</sup>       | 40  | NA       | NA                                        | NA                                                                                                                                                                   | 15    | 9       | NA                     | R     | 24                                      |
| Möhlenbruch et al, 2017 <sup>17</sup>  | 29  | 91.9     | CT and CTA or MR and MRA                  | LAO, mild-to-moderate premorbid disability, infarct size not ≤1/3 of MCA territory                                                                                   | 20    | NA      | SR                     | R     | NA                                      |
| Sallustio et al, 2017 <sup>18</sup>    | 62  | 84.9     | CT and CTA                                | Ant circ LAO (terminal ICA, M1, M2, or A1 or A2), NIHSS ≥10, premorbid mRS ≤2, present ≤5 hr                                                                         | 18    | 7.9     | SR and A               | P     | 62                                      |
| Son et al, 2017 <sup>19</sup>          | 34  | 82       | CTA or MRA                                | Ant circ LAO, infarct size ≤1/2 of MCA territory, premorbid mRS ≤2, present ≤8 hr                                                                                    | 18    | 8       | SR and A               | P     | 34                                      |
| Zacharatos et al, 2012 <sup>20</sup>   | 46  | 84       | CT and CTA, MRI, CTP/MRP if present ≥6 hr | Present ≤9 hr, infarct size ≤1/3 MCA territory                                                                                                                       | 17.5  | NA      | NA                     | R     | NA                                      |
| Lima et al, 2016 <sup>21</sup>         | 111 | 84.8     | NA                                        | NA                                                                                                                                                                   | 19.1  | 8       | SR and A               | R     | 87                                      |
| Parilla et al, 2015 <sup>23</sup>      | 34  | NA       | CT, CTA, and CTP                          | EVT performed as rescue therapy if no improvement in NIHSS of >4 within 60 min of starting IVT or if IVT contraindicated                                             | 18.1  | NA      | SR                     | R     | NA                                      |
| Castonguay et al, 2014 <sup>22</sup>   | 78  | 85.2     | NA                                        | NA                                                                                                                                                                   | 18.9  | NA      | SR                     | R     | 58                                      |
| Figueiredo et al, 2017 <sup>24</sup>   | 35  | 83.9     | CT, CTA                                   | ASPECTS <6, mRS ≤2                                                                                                                                                   | 17    | 8       | SR                     | P     | 35                                      |
| HERMES, 2016 <sup>8</sup>              | 99  | NA       | NA                                        | NA                                                                                                                                                                   | NA    | NA      | SR and A               | P     | NA                                      |

**Note:**—LAO indicates large artery occlusion; BA, basilar artery; SR, stent retriever; MRP, MR perfusion; Ant circ, anterior circulation; ICA, intra-arterial; A, aspiration; NA, not available; IVT, intravenous thrombolysis; prox, proximal; R, retrospective; P, prospective; INR, international normalized ratio; ICH, intracranial hemorrhage.
